# Supplementary material for: State-dependent and cell type-specific temporal processing in auditory thalamocortical circuit
Source: PubMed Central journal article supplement (PMC4700423; doi:10.1038/srep18873), 2016-01-05
Supplement: srep18873-s1.pdf [file srep18873-s1.pdf]

## **Supplementary Information**

### **State-dependent and cell type-specific temporal processing in auditory thalamocortical circuit**

Shuzo Sakata  
Strathclyde Institute of Pharmacy and Biomedical Sciences  
University of Strathclyde  
161 Cathedral Street, Glasgow G4 0RE, UK

Address correspondence to:  
Shuzo Sakata  
161 Cathedral Street, Glasgow G4 0RE, UK  
email: shuzo.sakata@strath.ac.uk  
tell: +44-141-548-2156

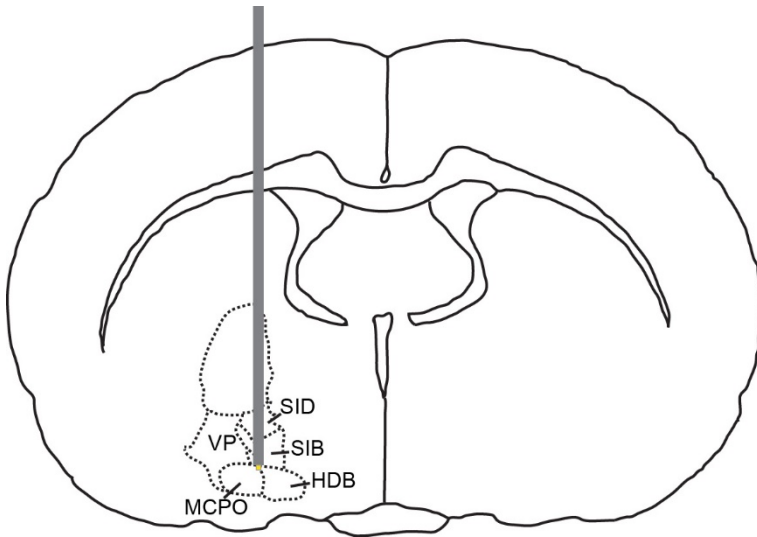

**Figure S1** A schematics of a stimulation electrode insertion into the basal forebrain. HDB, nucleus of the horizontal limb of the diagonal band. MCPO, magnocellular preoptic nucleus. SIB, substantia innominate, basal part. SID, substantia innominate, dorsal part. VP, ventral pallidum.

|     | BS1 | BS2   | BS3   | BS4   | NS    | MGB   |
|-----|-----|-------|-------|-------|-------|-------|
| BS1 |     | 0.204 | 0.039 | 0.901 | 0.338 | 0.882 |
| BS2 |     |       | 0.999 | 0.015 | 1.000 | 0.487 |
| BS3 |     |       |       | 0.001 | 0.994 | 0.051 |
| BS4 |     |       |       |       | 0.037 | 0.206 |
| NS  |     |       |       |       |       | 0.715 |
| MGB |     |       |       |       |       |       |

**Table S1** *P* values of post-hoc Tukey's honest significant different (HSD) test in **Figure 4b**. Red,  $p < 0.05$ .

|     | BS1 | BS2   | BS3   | BS4   | NS    | MGB   |
|-----|-----|-------|-------|-------|-------|-------|
| BS1 |     | 0.001 | 0.000 | 1.000 | 0.002 | 0.002 |
| BS2 |     |       | 0.857 | 0.008 | 1.000 | 0.914 |
| BS3 |     |       |       | 0.000 | 0.881 | 0.047 |
| BS4 |     |       |       |       | 0.015 | 0.027 |
| NS  |     |       |       |       |       | 0.952 |
| MGB |     |       |       |       |       |       |

**Table S2** *P* values of post-hoc HSD test in **Figure 4c**. Red,  $p < 0.05$ .

|         |        | AC-AC |        | MGB-MGB |        | AC-MGB |        |
|---------|--------|-------|--------|---------|--------|--------|--------|
|         |        | Sync  | Desync | Sync    | Desync | Sync   | Desync |
| AC-AC   | Sync   |       | 0.000  | 0.116   | 1.000  | 0.000  | 0.000  |
|         | Desync |       |        | 0.000   | 0.000  | 0.887  | 0.006  |
| MGB-MGB | Sync   |       |        |         | 0.415  | 0.000  | 0.000  |
|         | Desync |       |        |         |        | 0.000  | 0.000  |
| AC-MGB  | Sync   |       |        |         |        |        | 0.254  |
|         | Desync |       |        |         |        |        |        |

**Table S3** *P* values of post-hoc HSD test in **Figures 4f**. Red,  $p < 0.05$ .

|       |        | BS-BS |        | BS-NS |        | NS-NS |        |
|-------|--------|-------|--------|-------|--------|-------|--------|
|       |        | Sync  | Desync | Sync  | Desync | Sync  | Desync |
| BS-BS | Sync   |       | 0.000  | 0.000 | 0.879  | 0.000 | 0.000  |
|       | Desync |       |        | 0.000 | 0.217  | 0.000 | 0.016  |
| BS-NS | Sync   |       |        |       | 0.000  | 0.003 | 0.000  |
|       | Desync |       |        |       |        | 0.031 | 0.922  |
| NS-NS | Sync   |       |        |       |        |       | 0.000  |
|       | Desync |       |        |       |        |       |        |

**Table S4** *P* values of post-hoc HSD test in **Figures 4g**. Red,  $p < 0.05$ .

|        |        | BS-MGB |        | NS-MGB |        |
|--------|--------|--------|--------|--------|--------|
|        |        | Sync   | Desync | Sync   | Desync |
| BS-MGB | Sync   |        | 0.000  | 0.393  | 0.001  |
|        | Desync |        |        | 0.000  | 0.000  |
| NS-MGB | Sync   |        |        |        | 0.326  |
|        | Desync |        |        |        |        |

**Table S5** *P* values of post-hoc HSD test in **Figures 4h**. Red,  $p < 0.05$ .

|     |        | BS1  |        | BS2   |        | BS3   |        | BS4   |        | NS    |        |
|-----|--------|------|--------|-------|--------|-------|--------|-------|--------|-------|--------|
|     |        | Sync | Desync | Sync  | Desync | Sync  | Desync | Sync  | Desync | Sync  | Desync |
| BS1 | Sync   |      | 1.000  | 0.977 | 0.800  | 0.912 | 0.034  | 0.096 | 0.001  | 0.332 | 0.008  |
|     | Desync |      |        | 1.000 | 0.994  | 1.000 | 0.389  | 0.289 | 0.012  | 0.832 | 0.126  |
| BS2 | Sync   |      |        |       | 1.000  | 1.000 | 0.198  | 0.335 | 0.009  | 0.877 | 0.054  |
|     | Desync |      |        |       |        | 1.000 | 0.692  | 0.567 | 0.031  | 0.996 | 0.254  |
| BS3 | Sync   |      |        |       |        |       | 0.036  | 0.322 | 0.006  | 0.835 | 0.017  |
|     | Desync |      |        |       |        |       |        | 0.958 | 0.244  | 1.000 | 0.967  |
| BS4 | Sync   |      |        |       |        |       |        |       | 0.999  | 0.891 | 1.000  |
|     | Desync |      |        |       |        |       |        |       |        | 0.176 | 0.777  |
| NS  | Sync   |      |        |       |        |       |        |       |        |       | 0.885  |
|     | Desync |      |        |       |        |       |        |       |        |       |        |

**Table S6** *P* values of post-hoc HSD test in **Figures 6h**. Red,  $p < 0.05$ .
